# Supplementary material for: Examination of the chemical behavior of the quercetin radical cation towards some bases
Source: Royal Society of Chemistry journal article supplement (doi:10.1039/c3cp44605k), 2013-01-01
Supplement: c3cp44605k.pdf [file c3cp44605k.pdf]

## **Physical Chemistry Chemical Physics**

### **Examination of the chemical behavior of the quercetin radical cation towards some bases**

**Zoran Marković<sup>\*</sup>, Dragan Amić, Dejan Milenković, Jasmina M. Dimitrić-  
Marković and Svetlana Marković**

**ELECTRONIC SUPPLEMENTARY INFORMATION**

**Table S1** Experimental and calculated bond and dihedral angles of quercetin (Q).  
 Experimental and calculated data refer to the solid and gaseous phases, respectively

| Bond angle (°)           | Q <sub>exp</sub> <sup>1</sup> | Q <sub>calc</sub> |       |       |       |       |
|--------------------------|-------------------------------|-------------------|-------|-------|-------|-------|
|                          |                               | a                 | b     | c     | d     | e     |
| A(C3'-O3'-H3')           | 112.6                         | 108.6             | 108.6 | 108.2 | 108.3 | 108.3 |
| A(C4'-O4'-H4')           | 101.8                         | 110.8             | 110.7 | 110.6 | 110.5 | 110.3 |
| A(C3'-C4'-C5')           | 120.8                         | 120.2             | 120.0 | 120.1 | 120.0 | 120.2 |
| A(C4'-C5'-C6')           | 118.8                         | 120.3             | 120.5 | 120.5 | 120.5 | 120.4 |
| A(C5'-C6'-C1')           | 121.0                         | 119.9             | 120.2 | 117.0 | 120.0 | 119.9 |
| A(C6'-C1'-C2')           | 119.3                         | 119.4             | 118.7 | 119.0 | 118.9 | 119.3 |
| A(C1'-C2'-C3')           | 119.8                         | 120.5             | 120.9 | 120.8 | 120.9 | 120.6 |
| A(C6'-C1'-C2)            | 121.3                         | 121.7             | 121.9 | 121.8 | 121.8 | 121.6 |
| A(O1-C2-C3)              | 121.3                         | 119.9             | 119.1 | 119.3 | 119.5 | 119.9 |
| A(C2-C3-C4)              | 120.3                         | 121.1             | 121.5 | 121.2 | 121.2 | 121.1 |
| A(C2-C3-O3)              | 122.3                         | 123.4             | 123.7 | 124.2 | 124.2 | 124.1 |
| A(C3-O3-H3)              | 110.3                         | 105.0             | 104.5 | 103.9 | 104.0 | 104.5 |
| A(C3-C4-O4)              | 120.3                         | 118.9             | 118.8 | 118.6 | 118.7 | 118.8 |
| A(C3-C4-C10)             | 116.8                         | 116.7             | 116.9 | 117.0 | 116.9 | 116.7 |
| A(C4-C10-C9)             | 120.2                         | 119.3             | 119.2 | 119.3 | 119.3 | 119.4 |
| A(C10-C9-O1)             | 120.4                         | 120.5             | 120.4 | 120.4 | 120.4 | 120.5 |
| A(C10-C5-O5)             | 118.5                         | 120.7             | 120.5 | 120.1 | 120.3 | 120.2 |
| A(C5-O5-H5)              | 101.9                         | 108.2             | 107.7 | 107.2 | 107.3 | 107.5 |
| A(C10-C5-C6)             | 122.1                         | 119.8             | 119.7 | 119.6 | 119.6 | 119.8 |
| A(C5-C6-C7)              | 118.6                         | 119.4             | 119.6 | 119.5 | 119.6 | 119.4 |
| A(C6-C7-O7)              | 119.8                         | 121.0             | 121.3 | 121.2 | 121.2 | 120.9 |
| A(C6-C7-C8)              | 122.4                         | 122.3             | 122.1 | 122.2 | 122.2 | 122.3 |
| A(C7-C8-C9)              | 117.1                         | 117.5             | 117.7 | 117.6 | 117.7 | 117.5 |
| A(C8-C9-C10)             | 122.8                         | 122.2             | 122.2 | 122.0 | 122.1 | 122.1 |
| Mean relative error (%)  |                               | 1.59              | 1.71  | 1.80  | 1.70  | 1.58  |
| <b>Torsion angle (°)</b> |                               |                   |       |       |       |       |
| τ(C3-C2-C1'-C2')         | 7.0                           | 11.7              | 0.0   | 0.0   | 0.0   | 14.0  |

- a: M052X/6-311+G(d,p)  
 b: B3LYP/6-311+G(d,p)  
 c: B3P86/6-311+G(d,p)  
 d: PBE1PBE/6-311+G(d,p)  
 e: M052X/cc-pvtz

1 M. Rossi, L. F. Rickles and W. A. Halpin, *Bioorg. Chem.* 1986, **14**, 55–69.

**Table S2** Experimental and calculated bond distances of quercetin (Q). Experimental and calculated data refer to the solid and gaseous phases, respectively

| Bond distance (pm)      | $Q_{\text{exp}}^1$ | $Q_{\text{calc}}$ |       |       |       |       |
|-------------------------|--------------------|-------------------|-------|-------|-------|-------|
|                         |                    | a                 | b     | c     | d     | e     |
| D(C1'-C2')              | 139.7              | 140.1             | 140.8 | 140.4 | 140.4 | 139.8 |
| D(C2'-C3')              | 139.6              | 138.0             | 138.4 | 138.1 | 138.1 | 137.6 |
| D(C3'-C4')              | 137.6              | 139.7             | 140.3 | 140.0 | 140.0 | 139.4 |
| D(C4'-C5')              | 139.3              | 138.3             | 138.8 | 138.5 | 138.5 | 137.9 |
| D(C5'-C6')              | 139.1              | 138.9             | 139.1 | 138.8 | 138.8 | 138.5 |
| D(C1'-C6')              | 138.8              | 139.8             | 140.6 | 140.2 | 140.1 | 139.3 |
| D(C3'-O3')              | 137.3              | 135.7             | 136.3 | 135.4 | 135.3 | 135.7 |
| D(C4'-O4')              | 139.6              | 136.8             | 137.3 | 136.5 | 136.2 | 136.8 |
| D(O3'-H3')              | 99.0               | 96.3              | 96.6  | 96.5  | 96.3  | 96.2  |
| D(O4'-H4')              | 97.5               | 95.9              | 96.3  | 96.1  | 96.0  | 95.9  |
| D(C1'-C2)               | 147.9              | 146.5             | 146.5 | 145.8 | 145.9 | 146.2 |
| D(C2-O1)                | 136.5              | 136.5             | 137.3 | 136.5 | 136.2 | 136.4 |
| D(C2-C3)                | 135.7              | 135.7             | 136.8 | 136.6 | 136.5 | 135.3 |
| D(C3-C4)                | 144.9              | 144.9             | 145.0 | 144.3 | 144.4 | 144.5 |
| D(C4-C10)               | 141.8              | 143.2             | 143.3 | 142.6 | 142.7 | 142.7 |
| D(C10-C5)               | 142.0              | 141.6             | 142.2 | 141.7 | 141.7 | 141.3 |
| D(C5-C6)                | 135.5              | 138.2             | 138.7 | 138.4 | 138.4 | 137.8 |
| D(C6-C7)                | 140.3              | 139.8             | 140.2 | 139.9 | 139.9 | 139.5 |
| D(C7-C8)                | 138.6              | 138.8             | 139.4 | 139.1 | 139.0 | 138.5 |
| D(C8-C9)                | 139.7              | 138.4             | 138.8 | 138.5 | 138.5 | 138.1 |
| D(C9-C10)               | 139.2              | 139.9             | 140.5 | 140.1 | 140.1 | 139.5 |
| D(C9-O1)                | 137.0              | 135.2             | 135.8 | 135.2 | 134.9 | 135.0 |
| D(C4-O4)                | 126.7              | 124.5             | 125.7 | 125.5 | 125.2 | 124.6 |
| D(C3-O3)                | 135.1              | 135.2             | 135.6 | 134.8 | 134.6 | 135.2 |
| D(C5-O5)                | 137.5              | 133.5             | 134.1 | 133.3 | 133.1 | 133.4 |
| D(C7-O7)                | 135.8              | 135.3             | 136.0 | 135.2 | 135.0 | 135.3 |
| D(O3-H3)                | 90.6               | 97.1              | 97.7  | 97.8  | 97.5  | 97.2  |
| D(O5-H5)                | 94.8               | 98.0              | 98.7  | 99.0  | 98.6  | 98.4  |
| D(O7-H7)                | 91.4               | 96.0              | 96.3  | 96.2  | 96.0  | 96.0  |
| Mean relative error (%) |                    | 1.29              | 1.33  | 1.39  | 1.41  | 1.30  |

As expected, the solid-phase and gaseous-phase geometries of Q are not identical, due to intermolecular interactions in the solid state. Tables S1 and S2 show that the experimental geometry of Q is best reproduced with the M052X/6-311+G(d,p) level of theory. All further results were obtained using this theoretical model.

**Table S3** Calculated bond and dihedral angles of quercetin (Q) in the aqueous solution, and of the quercetin radical cation (Q<sup>•+</sup>) in the gaseous and aqueous phases

| <b>Bond angle (°)</b>    | <b>Q<sub>calc</sub></b> | <b>Q<sup>•+</sup><sub>calc</sub></b> |                  |
|--------------------------|-------------------------|--------------------------------------|------------------|
|                          | aqueous solution        | gaseous phase                        | aqueous solution |
| A(C3'-O3'-H3')           | 109.1                   | 111.0                                | 110.4            |
| A(C4'-O4'-H4')           | 110.7                   | 113.3                                | 112.4            |
| A(C3'-C4'-C5')           | 120.0                   | 120.9                                | 120.6            |
| A(C4'-C5'-C6')           | 120.2                   | 119.8                                | 119.7            |
| A(C5'-C6'-C1')           | 120.0                   | 120.1                                | 120.3            |
| A(C6'-C1'-C2')           | 119.7                   | 119.6                                | 119.5            |
| A(C1'-C2'-C3')           | 120.1                   | 120.4                                | 120.1            |
| A(C6'-C1'-C2)            | 121.5                   | 121.9                                | 121.9            |
| A(O1-C2-C3)              | 120.5                   | 118.0                                | 127.4            |
| A(C2-C3-C4)              | 121.1                   | 121.5                                | 121.1            |
| A(C2-C3-O3)              | 122.3                   | 124.2                                | 123.0            |
| A(C3-O3-H3)              | 106.5                   | 105.9                                | 107.9            |
| A(C3-C4-O4)              | 119.5                   | 116.3                                | 117.5            |
| A(C3-C4-C10)             | 116.5                   | 116.3                                | 116.4            |
| A(C4-C10-C9)             | 119.5                   | 119.7                                | 119.6            |
| A(C10-C9-O1)             | 120.4                   | 120.6                                | 120.8            |
| A(C10-C5-O5)             | 120.3                   | 121.1                                | 120.6            |
| A(C5-O5-H5)              | 107.8                   | 110.7                                | 109.2            |
| A(C10-C5-C6)             | 120.5                   | 119.8                                | 120.3            |
| A(C5-C6-C7)              | 119.2                   | 119.4                                | 119.1            |
| A(C6-C7-O7)              | 120.9                   | 122.3                                | 121.3            |
| A(C6-C7-C8)              | 122.2                   | 122.2                                | 122.3            |
| A(C7-C8-C9)              | 117.5                   | 117.5                                | 117.5            |
| A(C8-C9-C10)             | 122.6                   | 122.5                                | 122.7            |
| <b>Torsion angle (°)</b> |                         |                                      |                  |
| $\tau$ (C3-C2-C1'-C2')   | 29.0                    | 0.1                                  | 10.8             |



**Table S4** Calculated bond distances of quercetin (Q) in the aqueous solution, and of the quercetin radical cation ( $Q^{+\bullet}$ ) in the gaseous and aqueous phases

| <b>Bond distance</b><br>(pm) | <b>Q<sub>calc</sub></b> |                  | <b>Q<sup>+•</sup><sub>calc</sub></b> |                     |
|------------------------------|-------------------------|------------------|--------------------------------------|---------------------|
|                              | aqueous<br>solution     | gaseous<br>phase | gaseous<br>phase                     | aqueous<br>solution |
| D(C1'–C2')                   | 140.1                   | 141.3            | 141.3                                | 141.6               |
| D(C2'–C3')                   | 138.0                   | 136.9            | 136.9                                | 136.6               |
| D(C3'–C4')                   | 139.8                   | 142.3            | 142.3                                | 142.6               |
| D(C4'–C5')                   | 138.6                   | 139.5            | 139.5                                | 140.0               |
| D(C1'–C6')                   | 139.6                   | 142.3            | 142.3                                | 142.6               |
| D(C3'–O3')                   | 137.0                   | 133.5            | 133.5                                | 134.9               |
| D(C4'–O4')                   | 136.5                   | 133.1            | 133.1                                | 132.3               |
| D(O3'–H3')                   | 96.6                    | 96.5             | 96.5                                 | 96.7                |
| D(O4'–H4')                   | 96.4                    | 96.3             | 96.3                                 | 96.8                |
| D(C1'–C2)                    | 146.4                   | 142.5            | 142.5                                | 142.0               |
| D(C2–O1)                     | 136.3                   | 134.3            | 134.3                                | 134.9               |
| D(C2–C3)                     | 135.6                   | 140.1            | 140.1                                | 139.9               |
| D(C3–C4)                     | 144.4                   | 147.9            | 147.9                                | 147.4               |
| D(C4–C10)                    | 143.4                   | 141.4            | 141.4                                | 142.1               |
| D(C10–C5)                    | 141.6                   | 142.3            | 142.3                                | 141.9               |
| D(C5–C6)                     | 137.8                   | 138.5            | 138.5                                | 137.9               |
| D(C6–C7)                     | 139.9                   | 139.2            | 139.2                                | 139.6               |
| D(C7–C8)                     | 138.8                   | 140.8            | 140.8                                | 139.7               |
| D(C8–C9)                     | 138.4                   | 136.6            | 136.6                                | 137.3               |
| D(C9–C10)                    | 139.9                   | 140.7            | 140.7                                | 140.4               |
| D(C9–O1)                     | 135.6                   | 137.1            | 137.1                                | 136.5               |
| D(C4–O4)                     | 125.2                   | 123.4            | 123.4                                | 123.9               |
| D(C3–O3)                     | 136.1                   | 130.7            | 130.7                                | 131.0               |
| D(C5–O5)                     | 135.1                   | 132.3            | 132.3                                | 134.3               |
| D(C7–O7)                     | 135.8                   | 133.4            | 133.4                                | 134.8               |
| D(O3–H3)                     | 97.1                    | 98.4             | 98.4                                 | 97.9                |
| D(O5–H5)                     | 98.0                    | 97.4             | 97.4                                 | 97.6                |
| D(O7–H7)                     | 96.5                    | 96.2             | 96.2                                 | 96.6                |

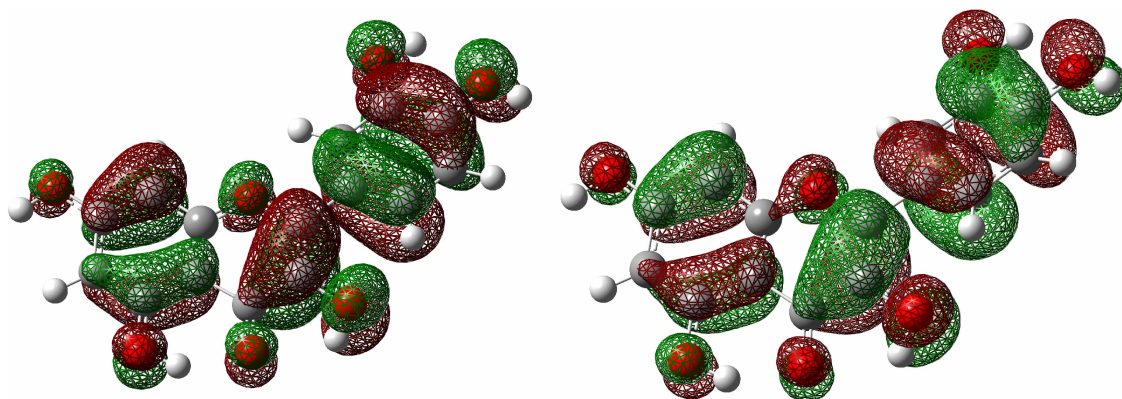

**Fig. S1** HOMO of quercetin in the gaseous (left) and aqueous (right) phase.

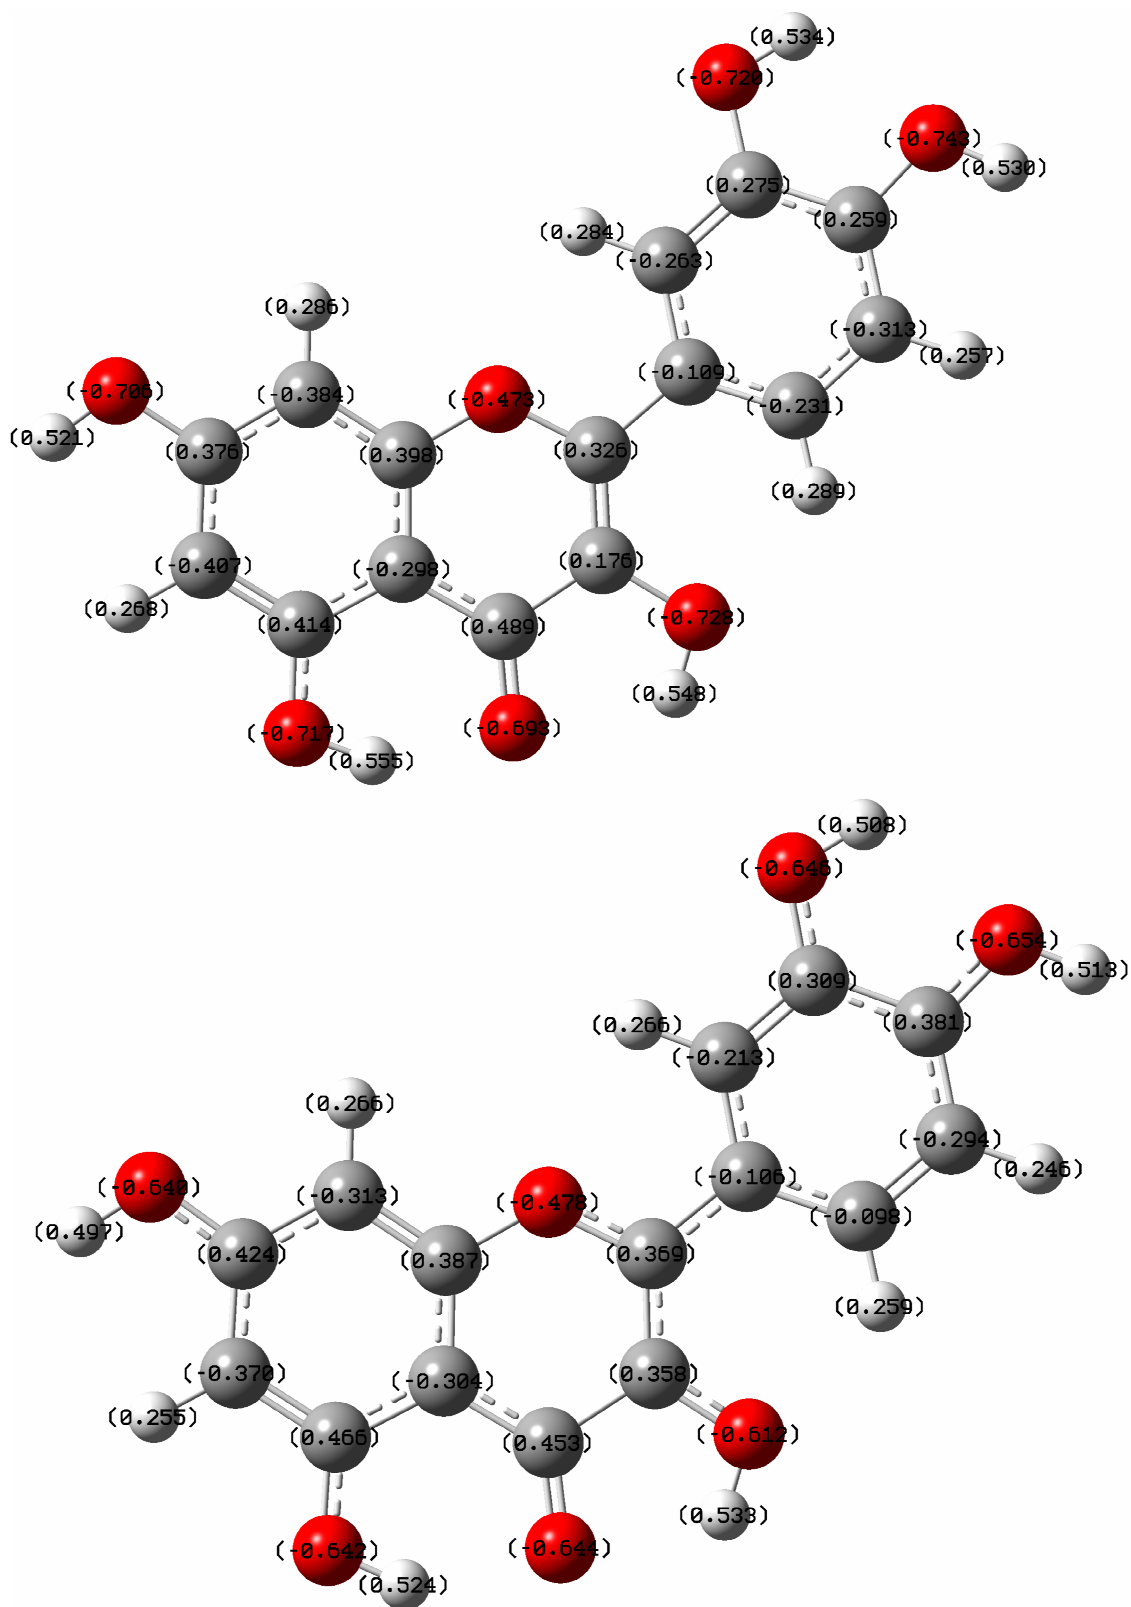

**Fig. S2** The NBO charge distribution in quercetin (top) and its radical cation (bottom).

## Results for the reactions of different OH groups of Q<sup>+</sup> with hydroxide anion in the gaseous phase

All reactant complexes spontaneously transformed into Q and hydroxyl radical, implying that the presented results relate to the H atom transfer from different positions of Q to the hydroxyl radical.

### Results of the IRC calculations (Figs S3 – S6)

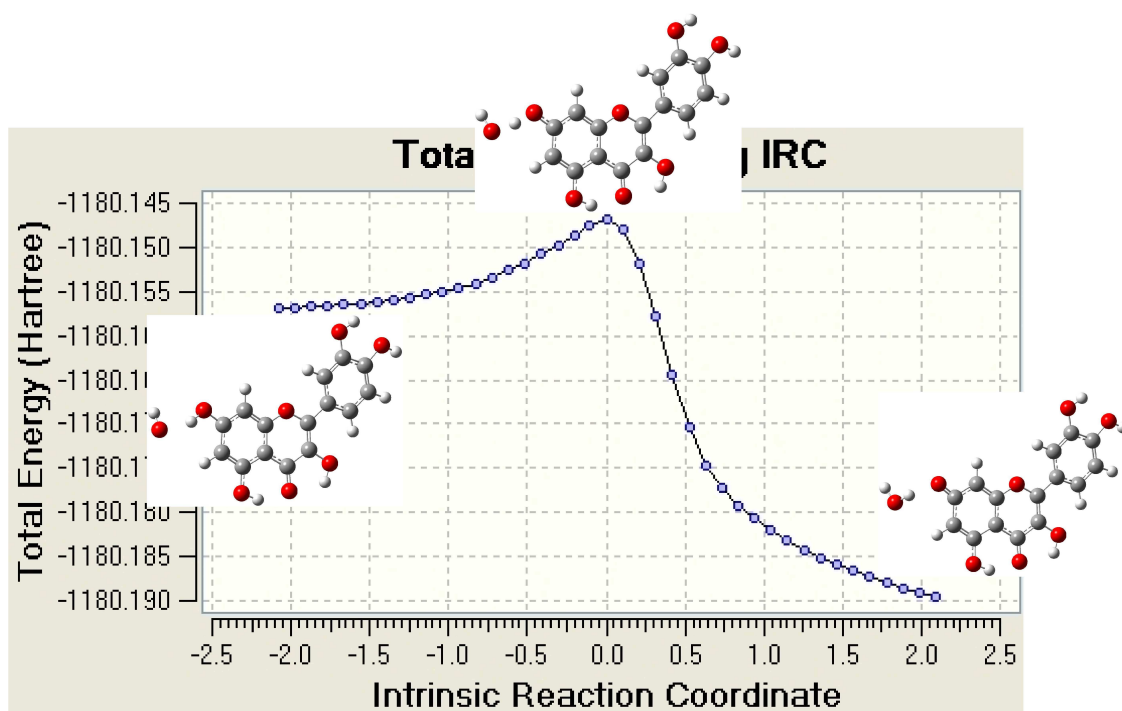

Fig. S3 Reaction in the position 7 of Q in the gaseous state.

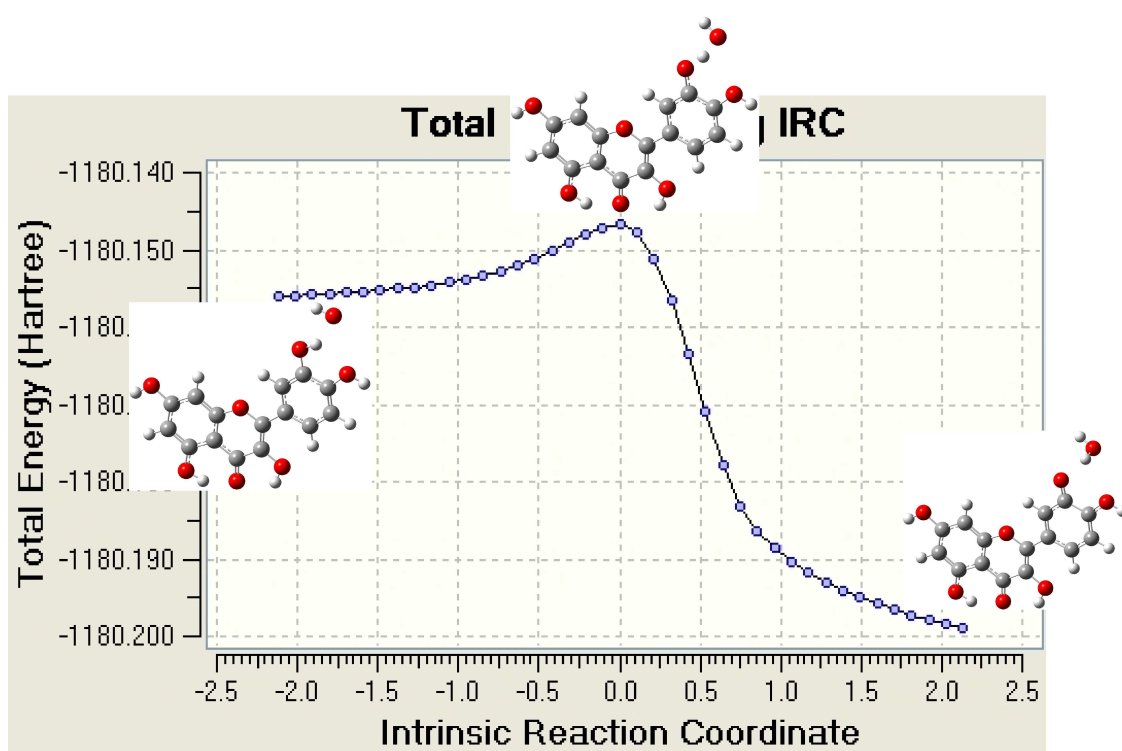

Fig. S4 Reaction in the position 3' of Q in the gaseous state.

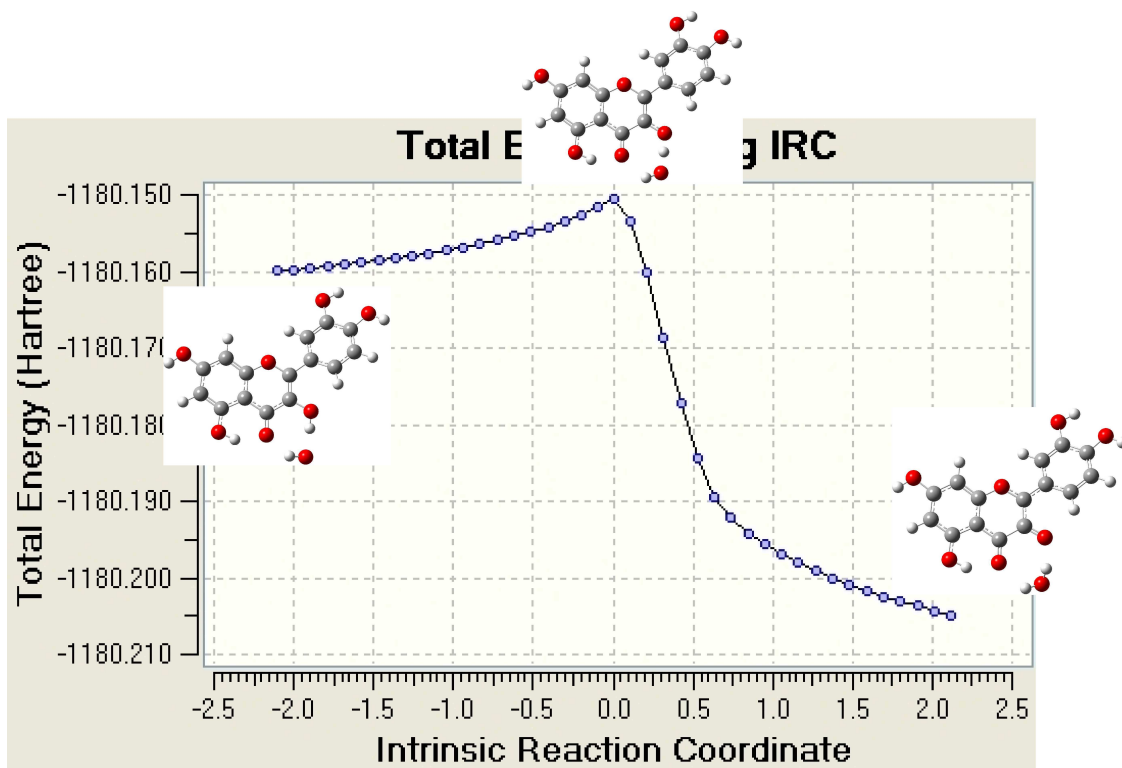

Fig. S5 Reaction in the position 3 of Q in the gaseous state.

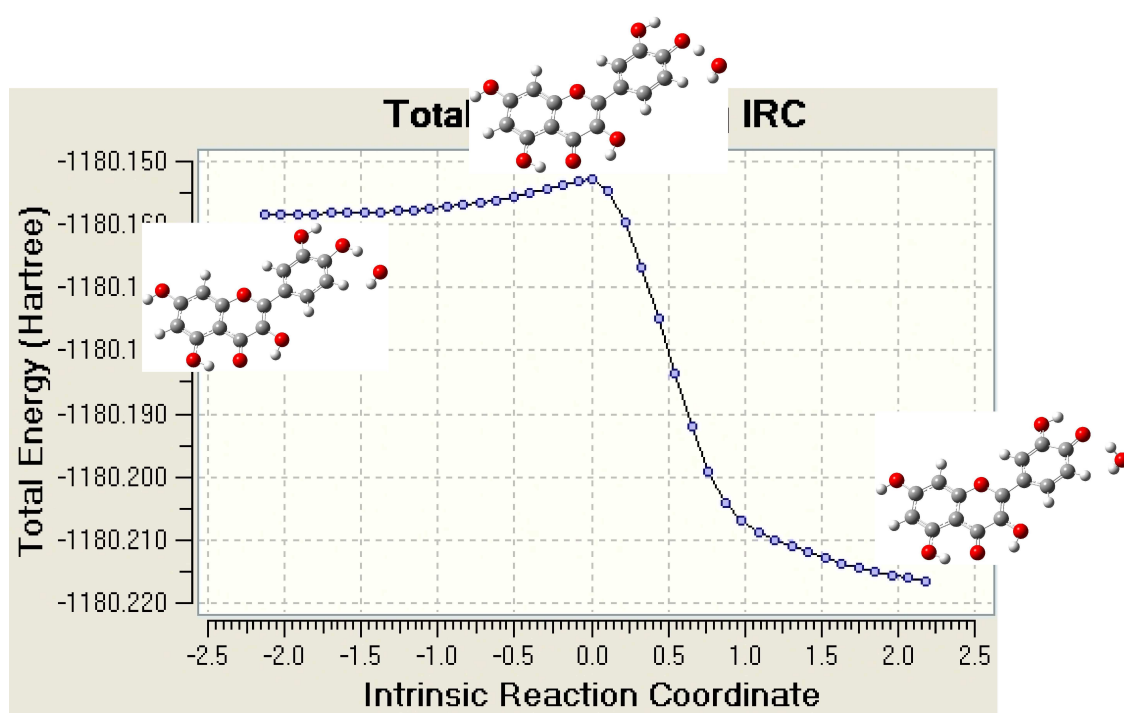

**Fig. S6** Reaction in the position 4' of Q in the gaseous state.

**Table S5** Crucial bond distances in the participants in the reactions of hydroxyl radical with different OH groups of Q in the gaseous phase

| Species | Bond distances (pm) |       |           |       |           |
|---------|---------------------|-------|-----------|-------|-----------|
|         |                     |       |           |       |           |
| RC7     |                     | 210.0 |           | 96.6  | 134.7     |
| TS7     | O11 – H7            | 131.4 | H7 – O7   | 106.1 | O7 – C7   |
| PC7     |                     | 96.6  |           | 193.9 | 124.5     |
| RC3'    |                     | 195.7 |           | 96.8  | 135.1     |
| TS3'    | O11 – H3'           | 139.2 | H3' – O3' | 103.7 | O3' – C3' |
| PC3'    |                     | 96.4  |           | 206.2 | 124.1     |
| RC3     |                     | 196.3 |           | 97.2  | 134.9     |
| TS3     | O11 – H3            | 130.9 | H3 – O3   | 108.3 | O3 – C3   |
| PC3     |                     | 96.3  |           | 202.6 | 123.3     |
| RC4'    |                     | 209.8 |           | 96.5  | 136.5     |
| TS4'    | O11 – H4'           | 144.6 | H4' – O4' | 102.0 | O4' – C4' |
| PC4'    |                     | 96.7  |           | 192.9 | 124.5     |

### Spin density distribution in the participants in the reactions of Q with hydroxyl radical (Figs S7 – S10)

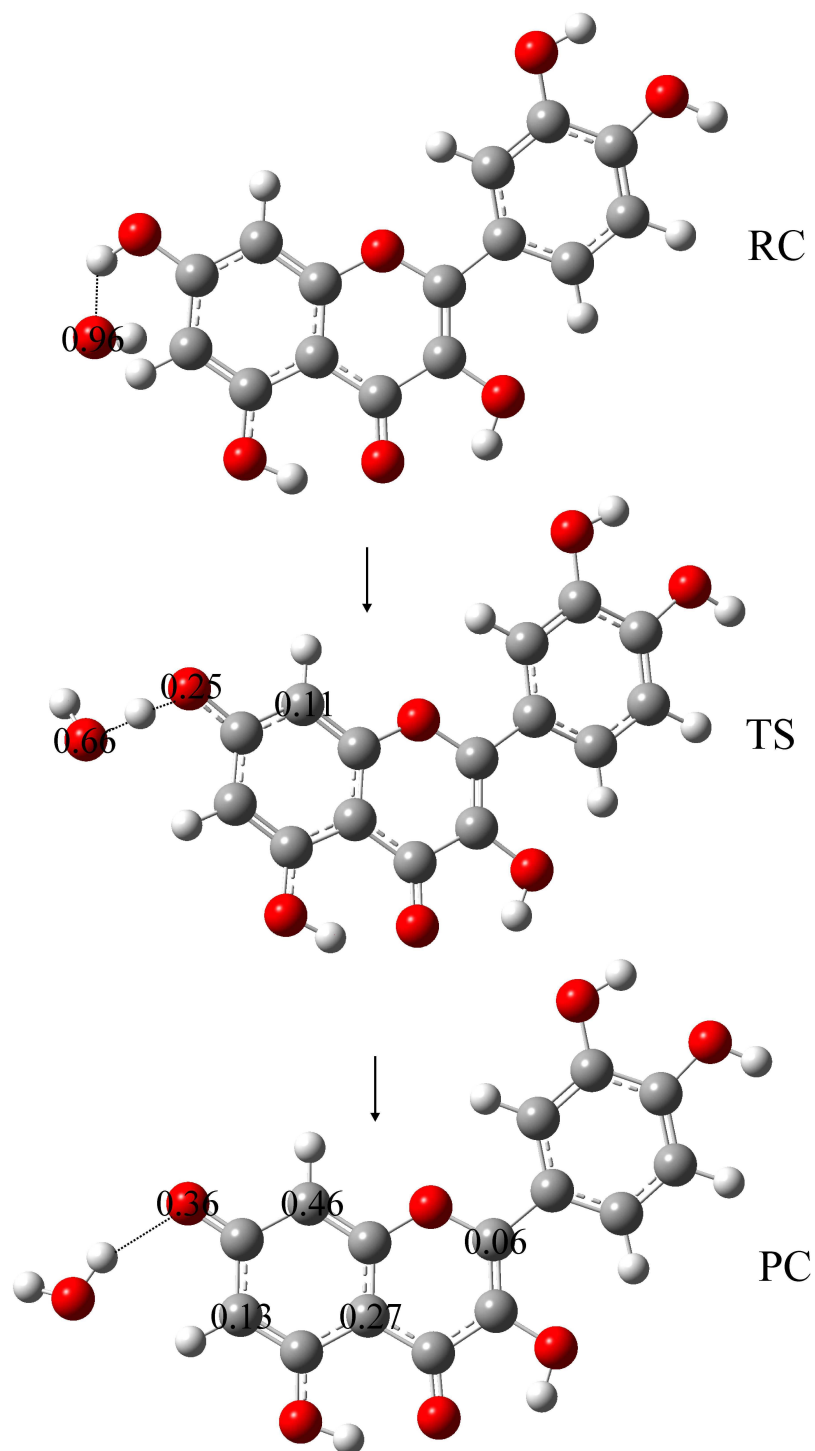

**Fig. S7** Reaction in the position 7 of Q in the gaseous phase.

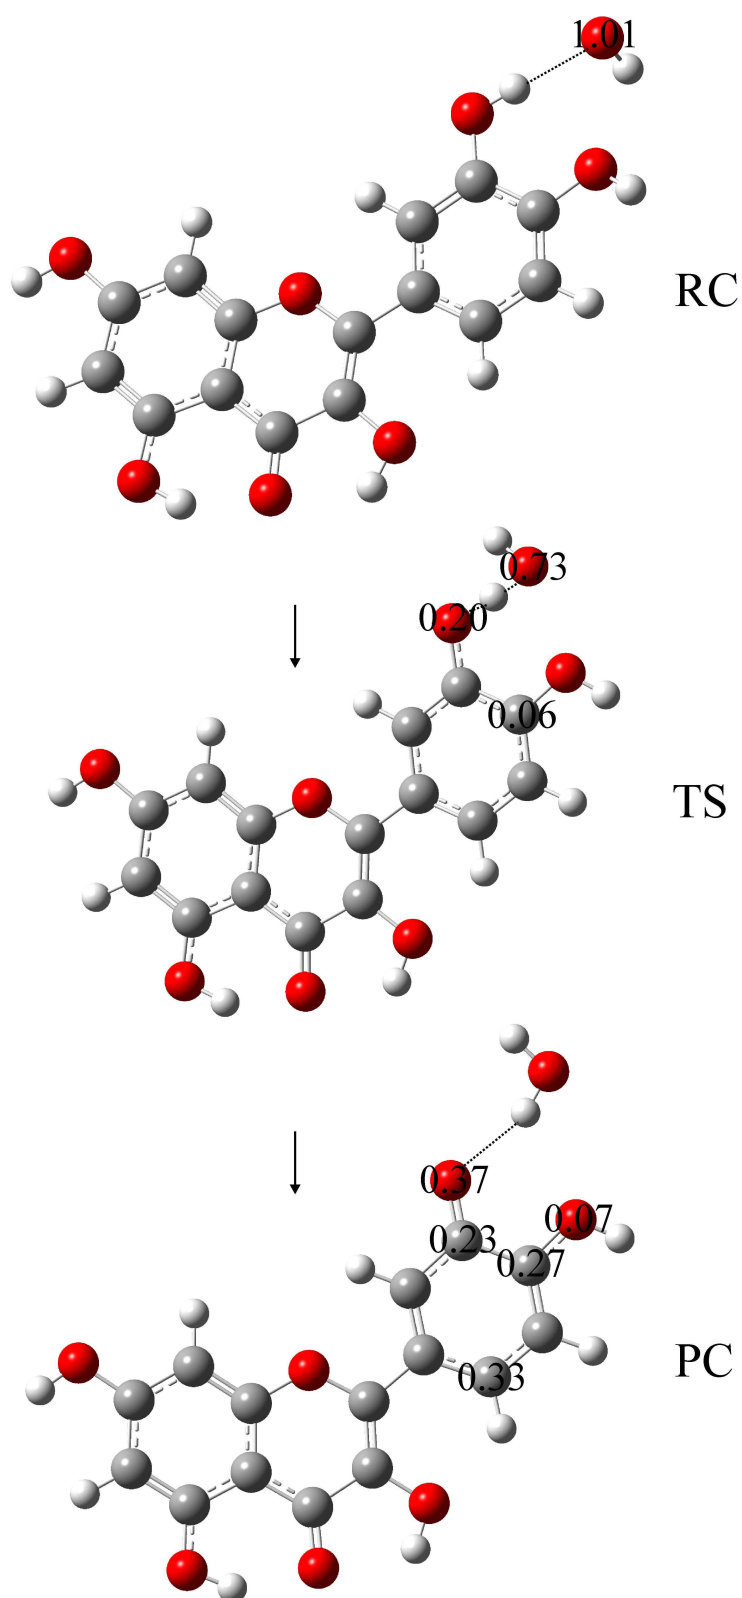

**Fig. S8** Reaction in the position 3' of Q in the gaseous phase.



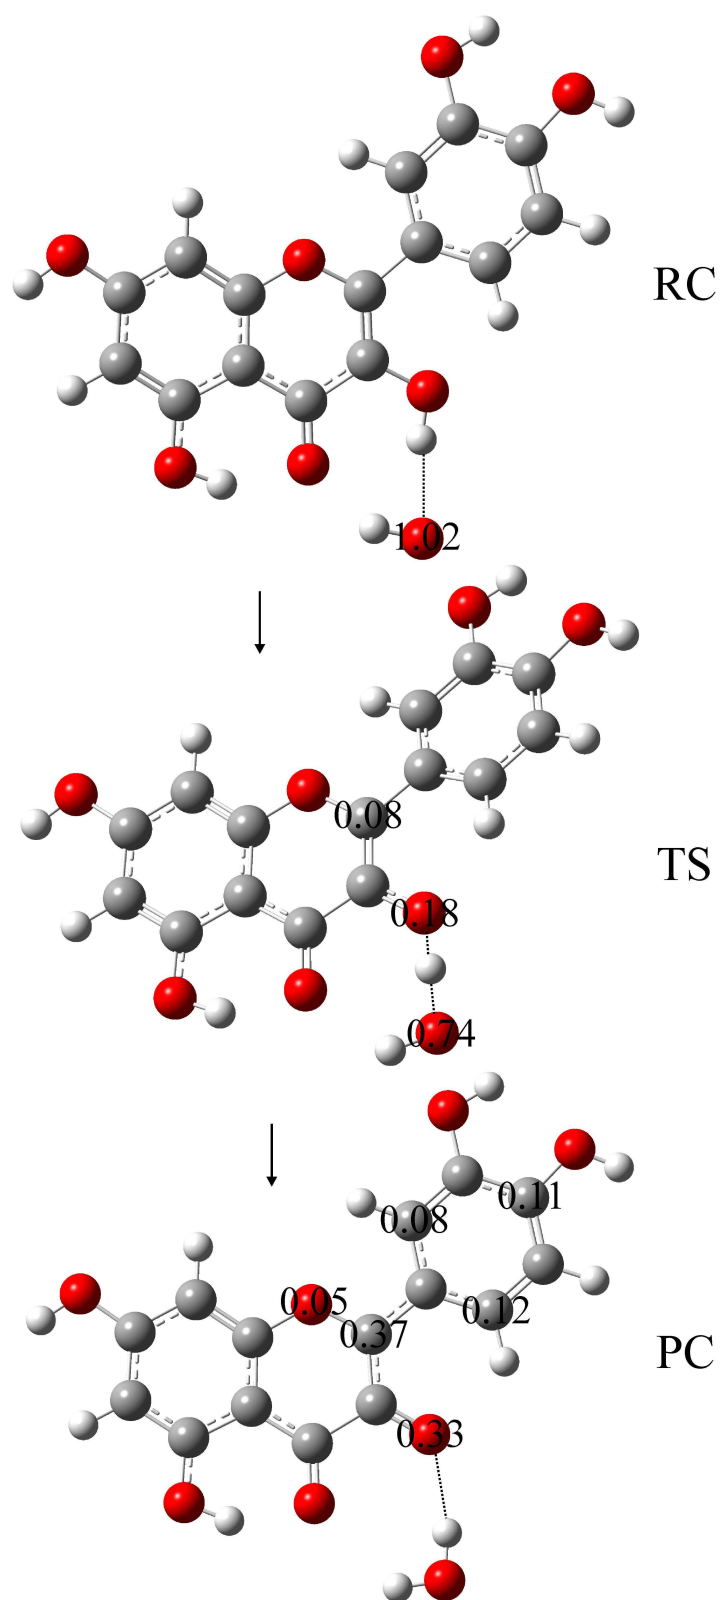

**Fig. S9** Reaction in the position 3 of Q in the gaseous phase.

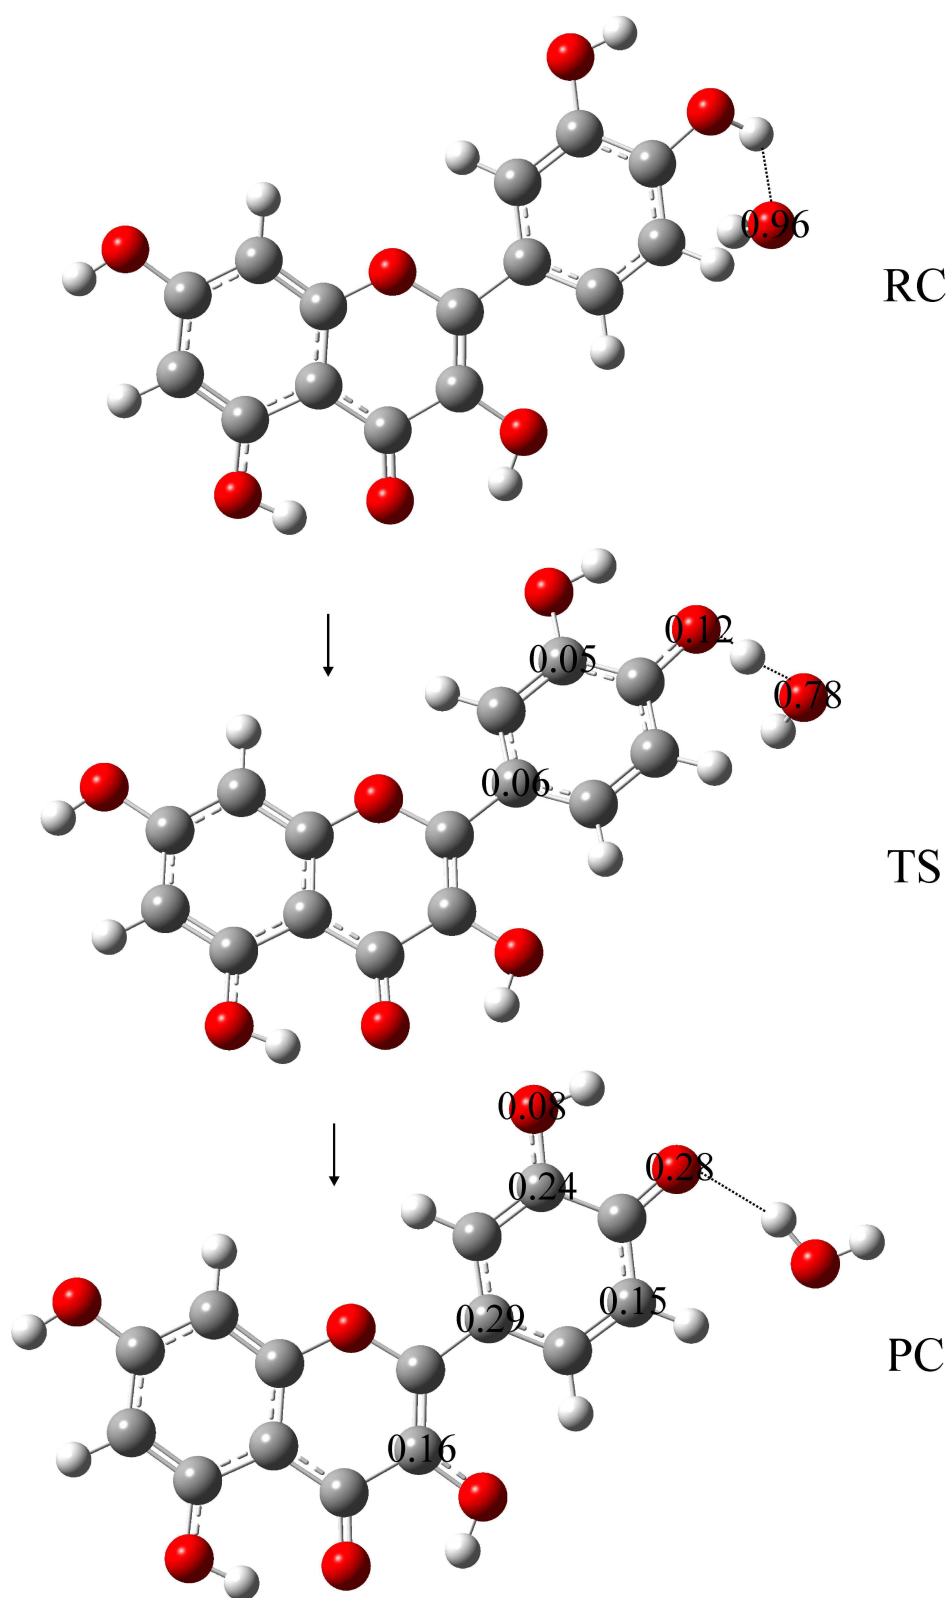

**Fig. S10** Reaction in the position 4' of Q in the gaseous phase.

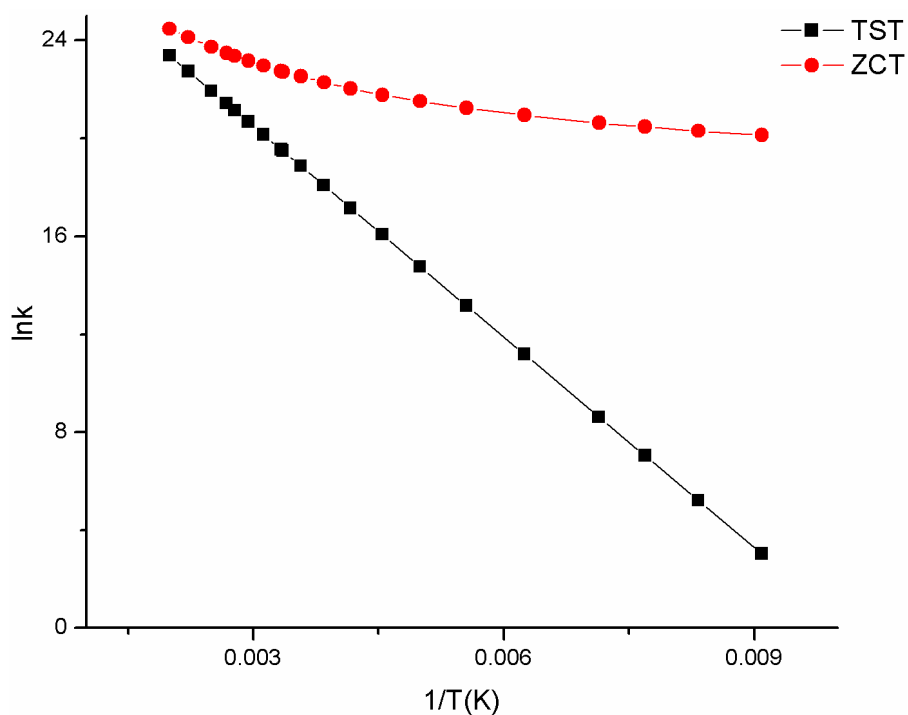

**Fig. S11** Plot of  $\ln k$  ( $k^{TST}$  and  $k^{ZCT}$ ) versus  $1/T$  for the reaction in the position 7 of Q in the gaseous phase.

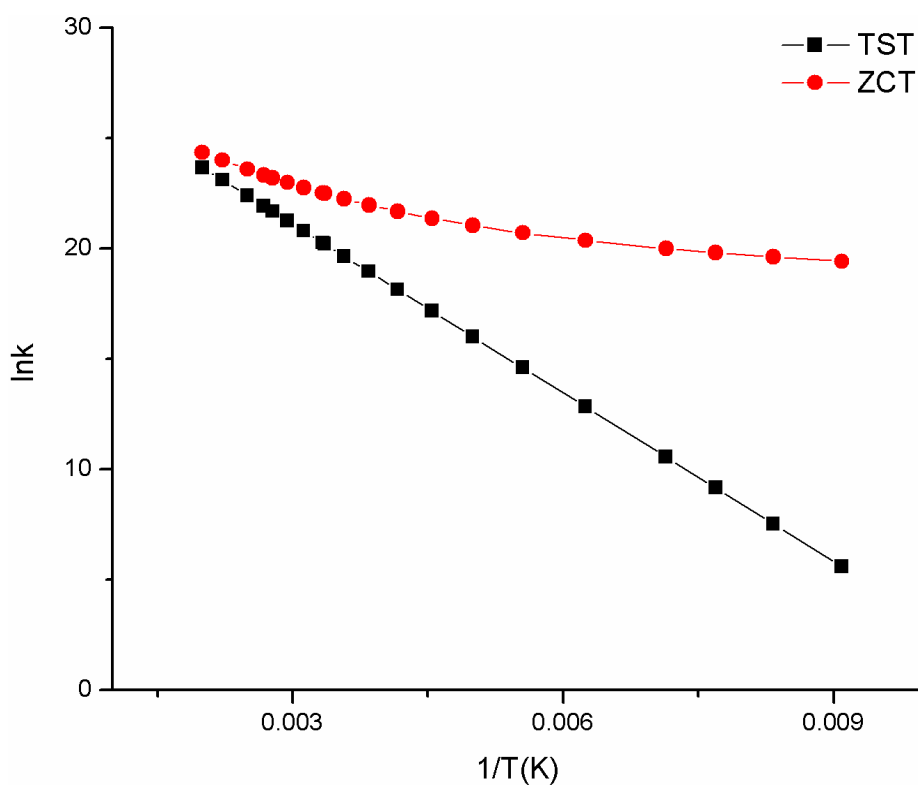

**Fig. S12** Plot of  $\ln k$  ( $k^{TST}$  and  $k^{ZCT}$ ) versus  $1/T$  for the reaction in the position 3' of Q in the gaseous phase.

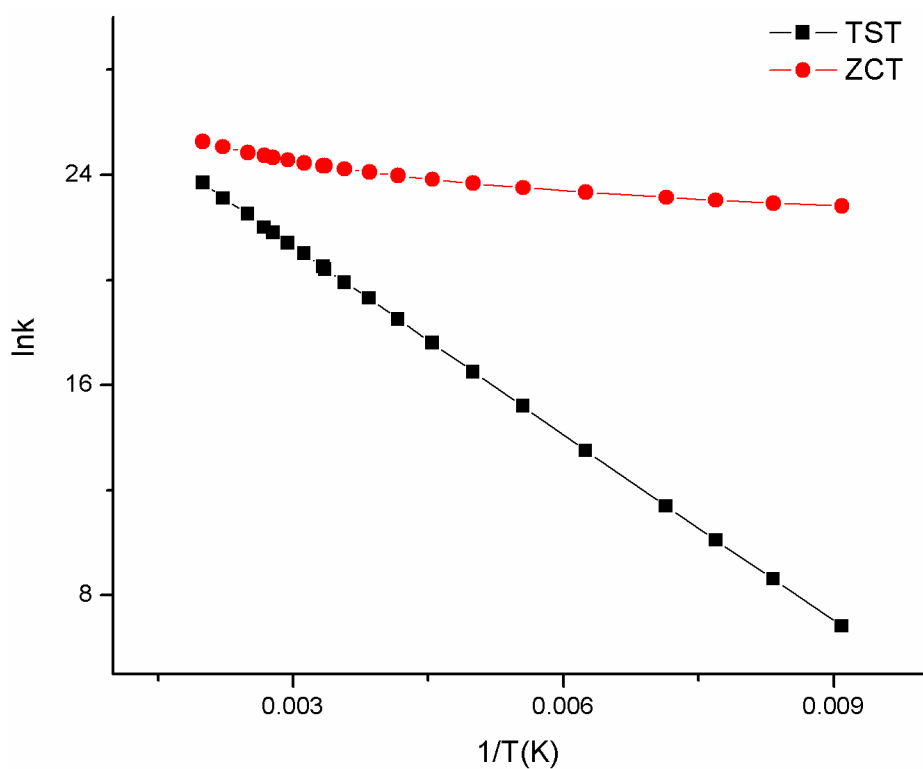

**Fig. S13** Plot of  $\ln k$  ( $k^{TST}$  and  $k^{ZCT}$ ) versus  $1/T$  for the reaction in the position 3 of Q in the gaseous phase.

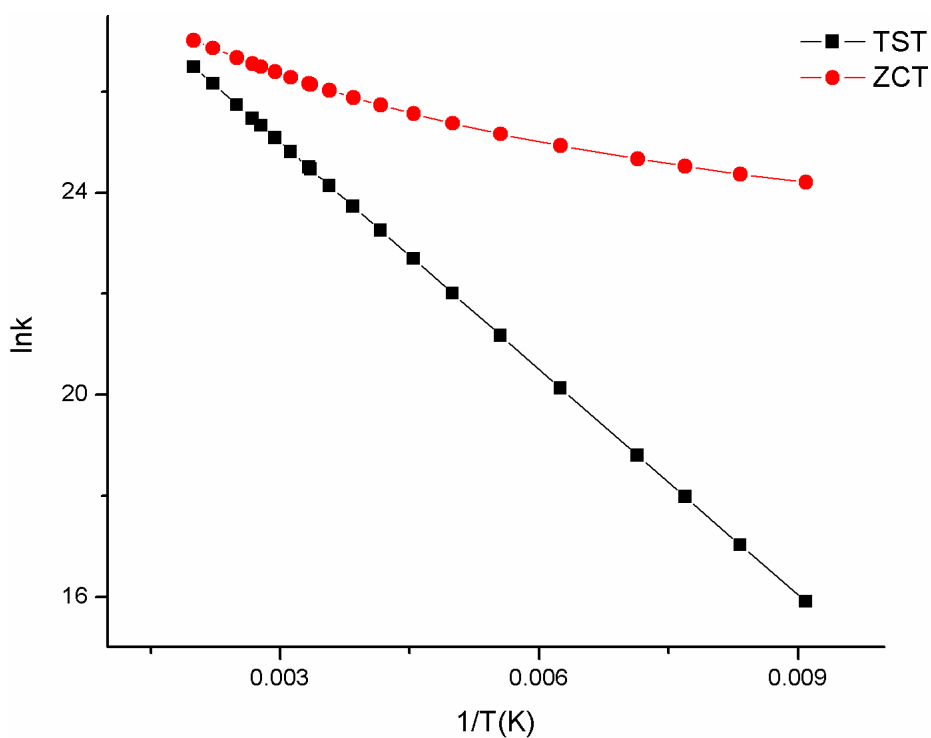

**Fig. S14** Plot of  $\ln k$  ( $k^{TST}$  and  $k^{ZCT}$ ) versus  $1/T$  for the reaction in the position 4' of Q in the gaseous phase.

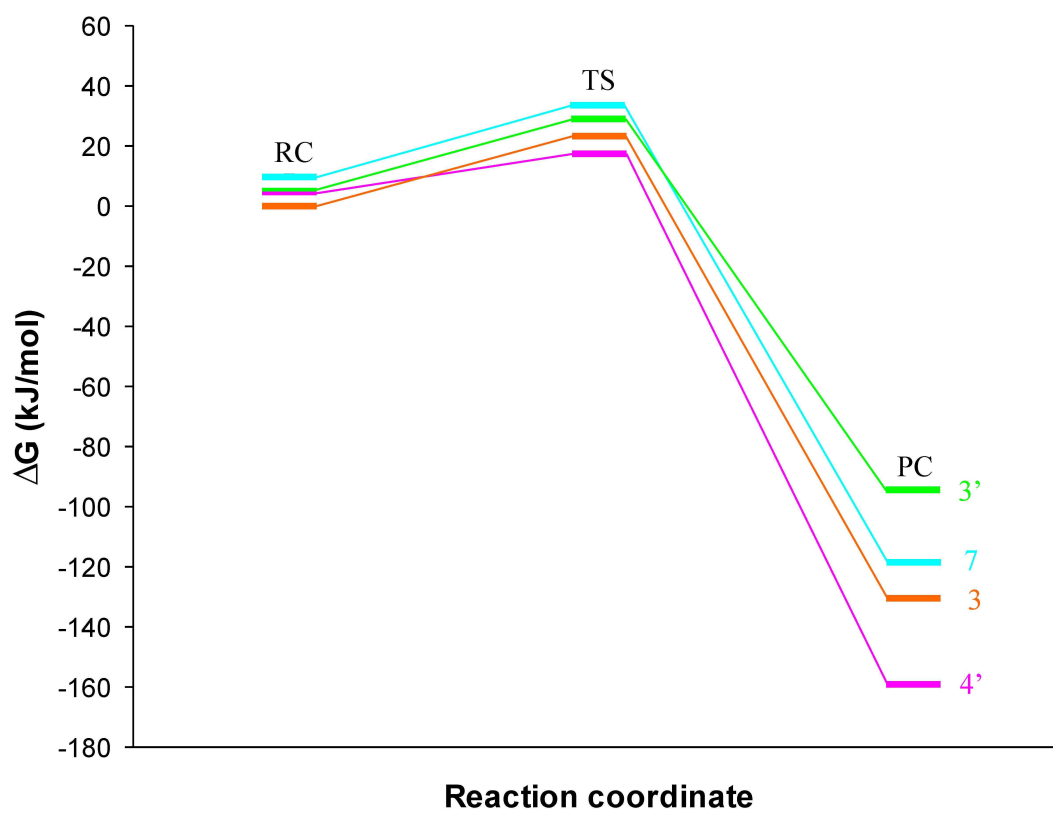

**Fig. S15** Energy profile for the reactions of hydroxyl radical with different OH groups of Q in the gaseous phase

## Results for the reactions of different OH groups of $Q^{+\bullet}$ with hydroxide anion in the aqueous phase

In each reaction of  $Q^{+\bullet}$  with hydroxide anion in the aqueous phase, an electron is not spontaneously transferred from the hydroxide anion to  $Q^{+\bullet}$ , implying that phenolic hydrogen is transferred as a proton, i.e., that  $Q^{+\bullet}$  undergoes the SET-PT mechanism.

**Table S6** Crucial bond distances in the product complexes of the reactions of  $Q^{+\bullet}$  with hydroxide anion in the aqueous solution

| Species | Bond distances (pm) |      |           |       |           |       |
|---------|---------------------|------|-----------|-------|-----------|-------|
| PC5     | O11 – H5            | 96.9 | H5 – O5   | 189.6 | O5 – C5   | 123.7 |
| PC7     | O11 – H7            | 97.0 | H7 – O7   | 187.0 | O7 – C7   | 124.6 |
| PC3'    | O11 – H3'           | 97.0 | H3' – O3' | 187.5 | O3' – C3' | 124.7 |
| PC3     | O11 – H3            | 96.9 | H3 – O3   | 189.6 | O3 – C3   | 124.1 |
| PC4'    | O11 – H4'           | 97.0 | H4' – O4' | 186.8 | O4' – C4' | 124.8 |

### Spin density distribution in the hypothetical reactant complexes and product complexes (Figs S16 – S20)

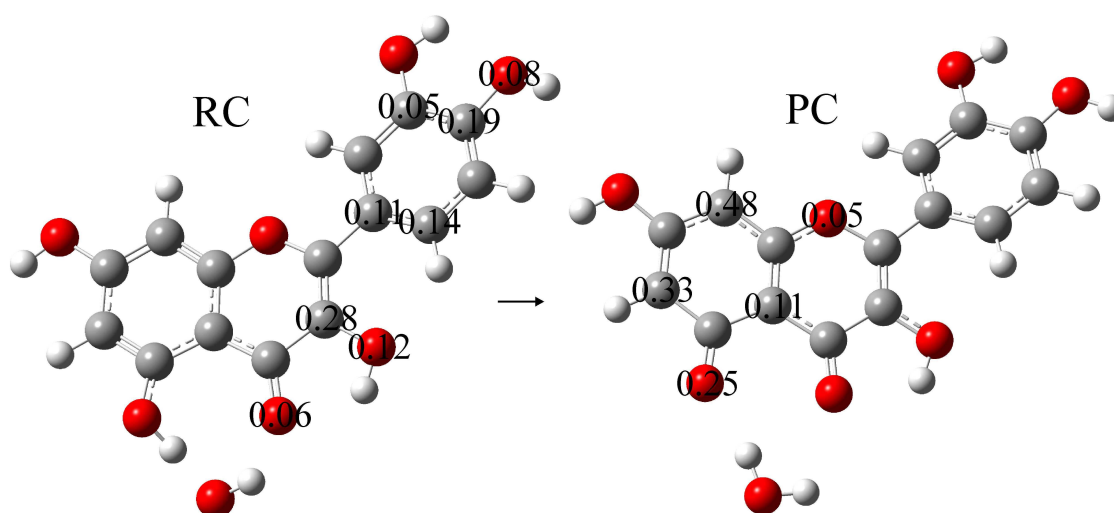

**Fig. S16** Reaction in the position 5 of  $Q^{+\bullet}$  in the aqueous solution.

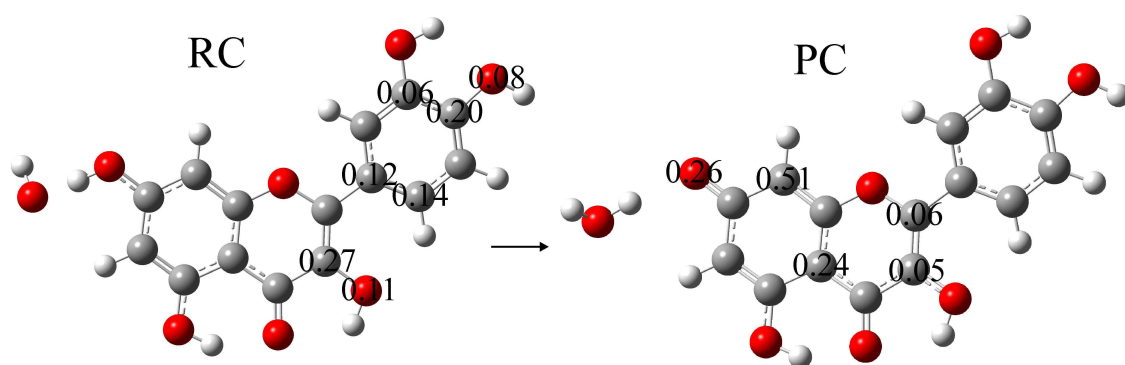

**Fig. S17** Reaction in the position 7 of  $Q^{+\bullet}$  in the aqueous solution.

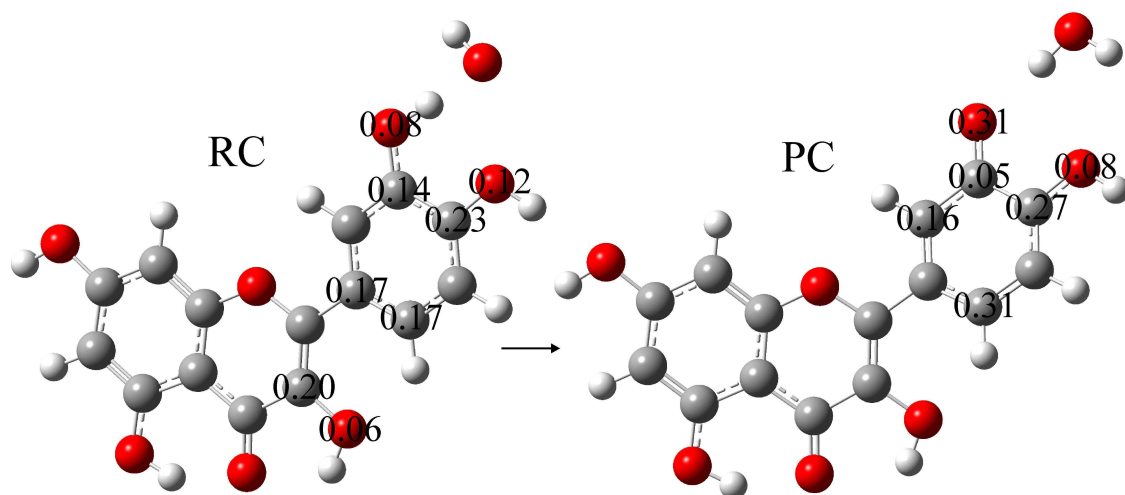

**Fig. S18** Reaction in the position 3' of  $Q^{+\bullet}$  in the aqueous solution.

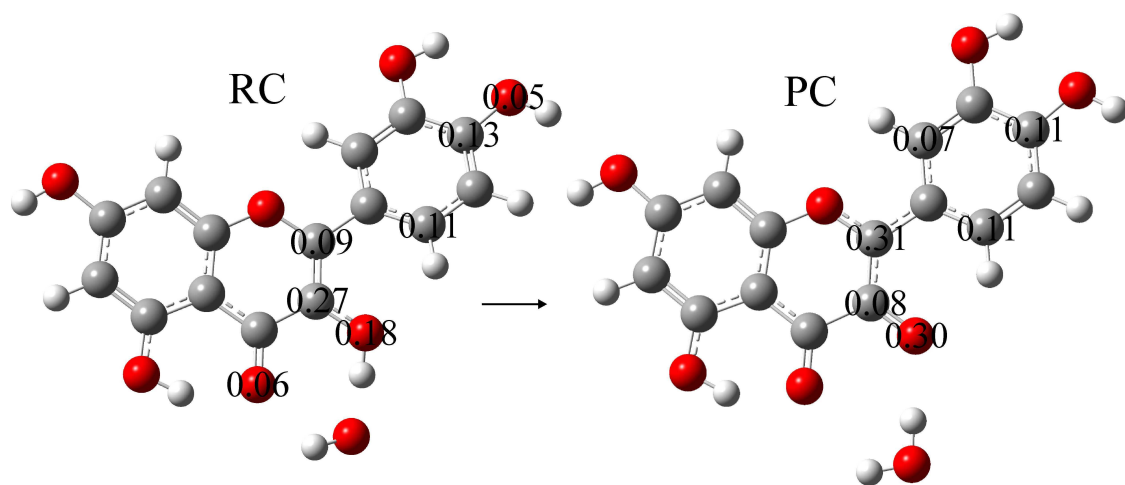

**Fig. S19** Reaction in the position 3 of  $Q^{+\bullet}$  in the aqueous solution.

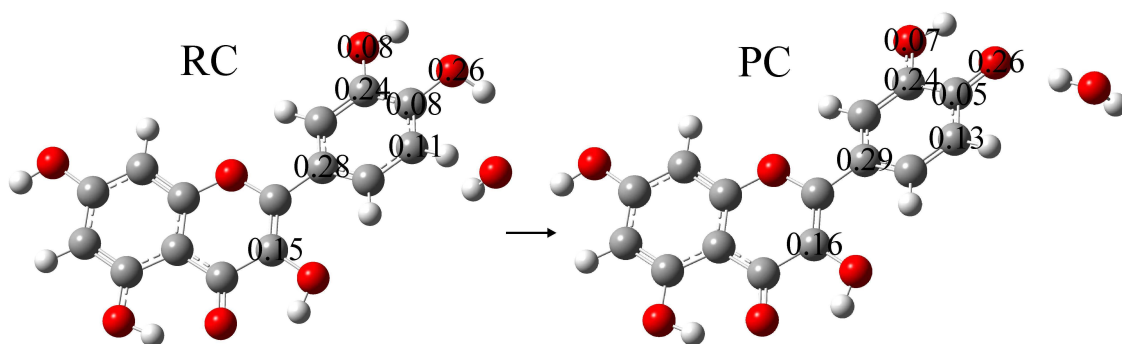

**Fig. S20** Reaction in the position 4' of  $Q^{+\bullet}$  in the aqueous solution.

### Results for the reaction of $Q^{+\bullet}$ with the MeS anion in the gaseous and aqueous phases

In the reaction of  $Q^{+\bullet}$  with the MeS anion in both gaseous and aqueous phases, an electron is spontaneously transferred from the anion to  $Q^{+\bullet}$ , implying that the results below relate to a transfer of phenolic hydrogen atom from Q to the  $CH_3S^\bullet$  radical, where Q undergoes the HAT mechanism.

### Results of the IRC calculations (Figs S21, S22)

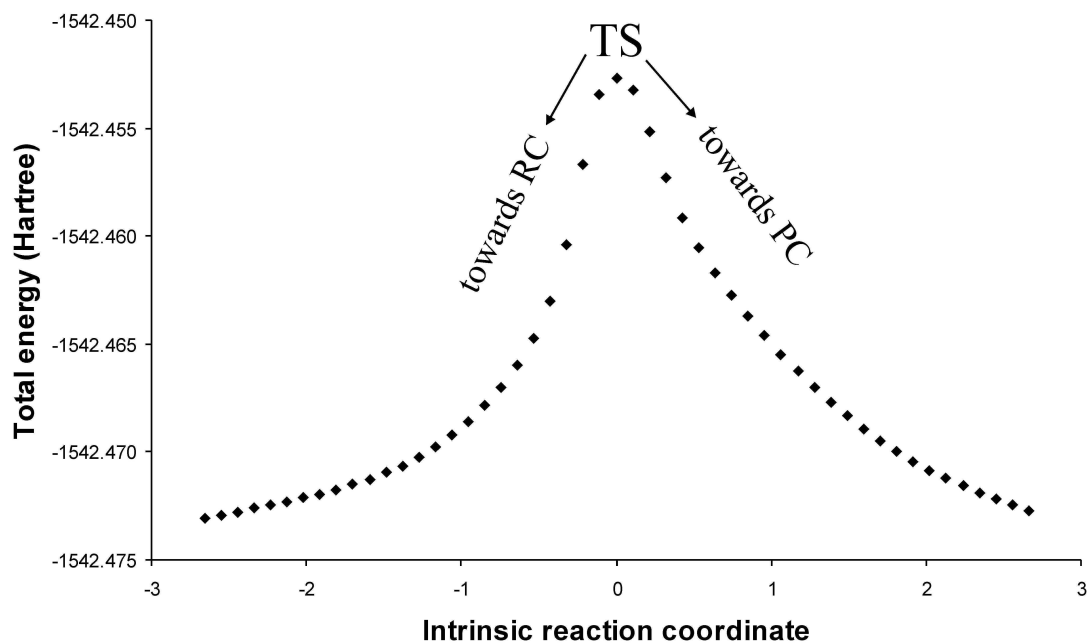

**Fig. S21** Reaction in the position 4' of Q in the gaseous phase.



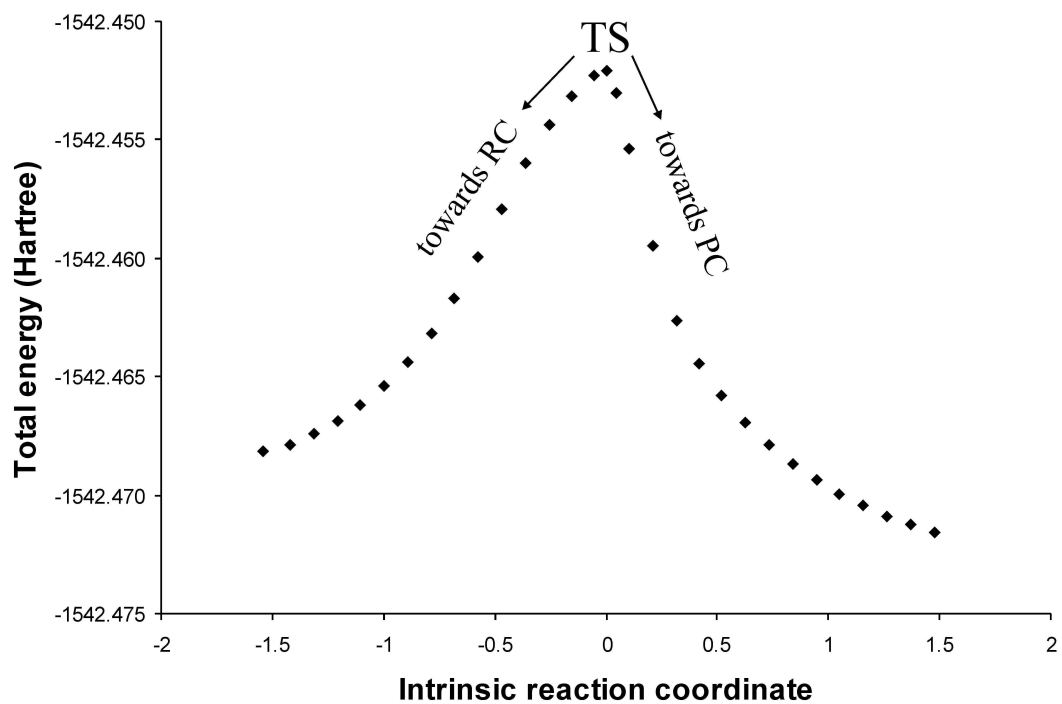

**Fig. S22** Reaction in the position 4' of Q in the aqueous solution.

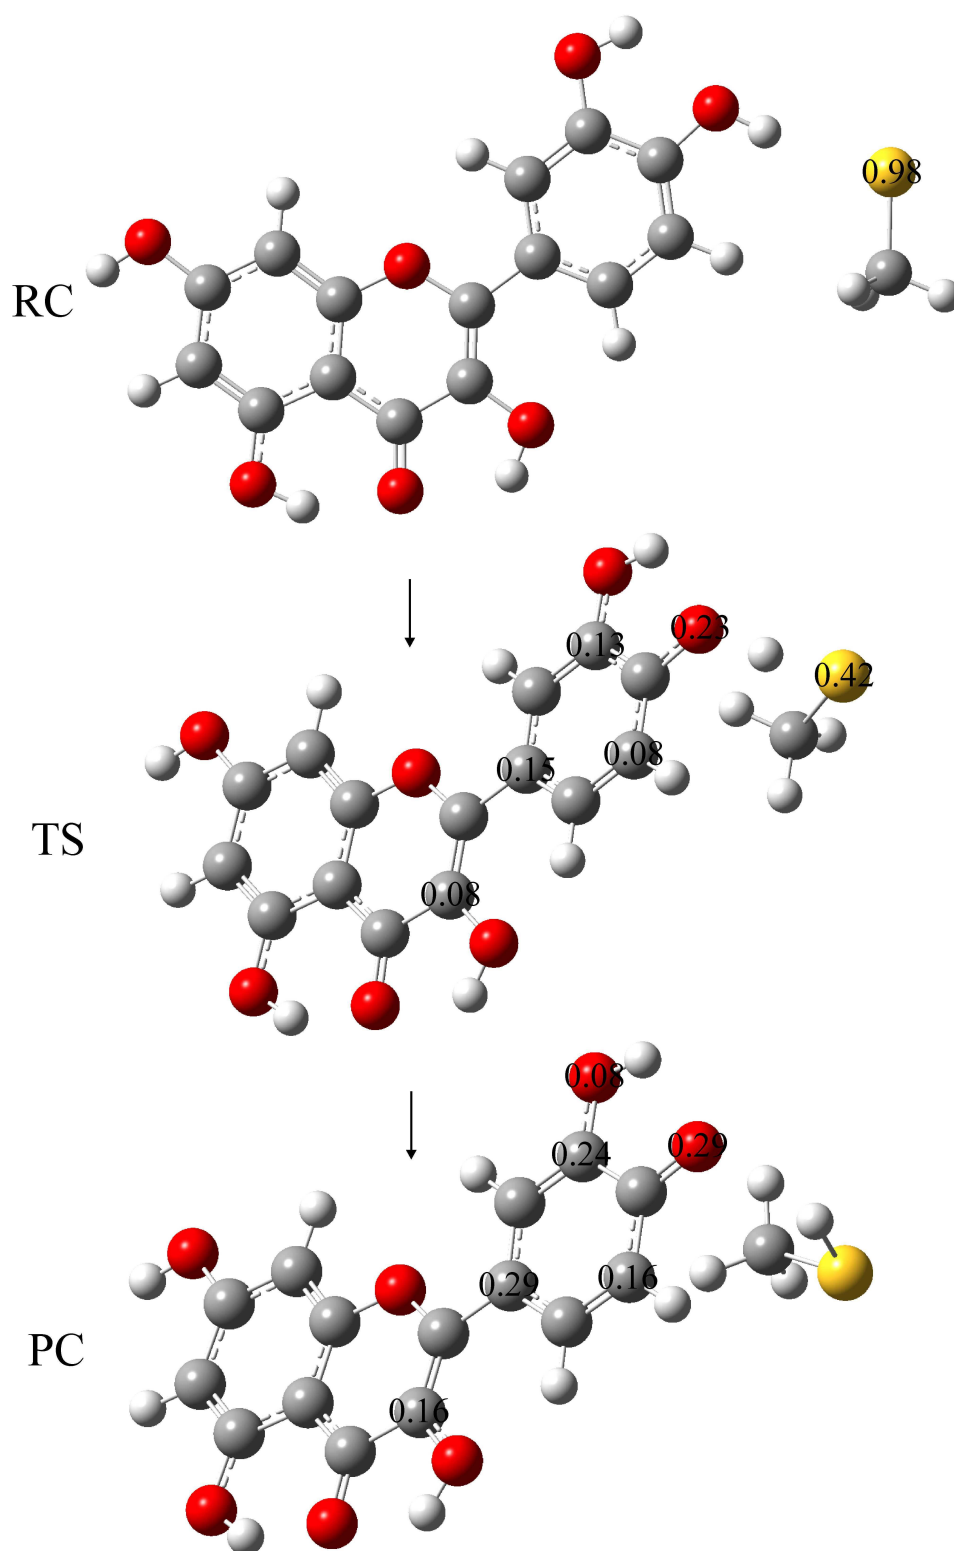

**Fig. S23** Reaction in the position 4' of Q with  $\text{CH}_3\text{S}^\bullet$  radical in the gaseous phase. Spin density distribution in the participants in the reaction.

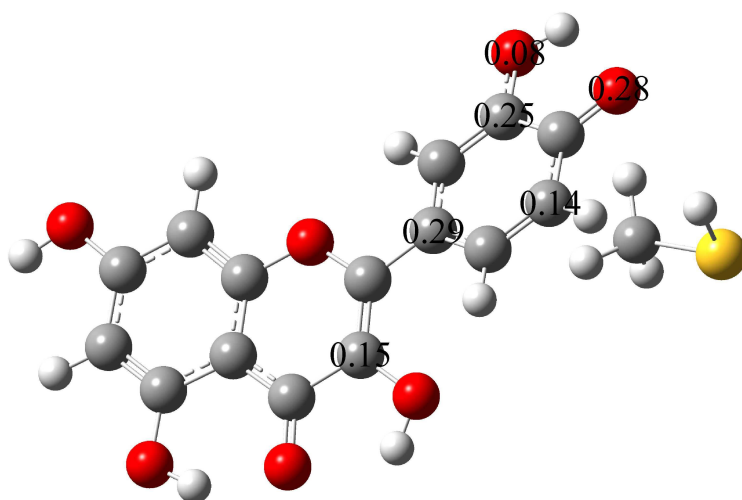

**Fig. S24** Spin density distribution in the product complex of the reaction in the position 4' of Q with  $\text{CH}_3\text{S}^\bullet$  radical in the aqueous solution.

### Results for the reaction of $\text{Q}^{+\bullet}$ with methylamine in the gaseous and aqueous phases

In the reaction of  $\text{Q}^{+\bullet}$  with methylamine in both gaseous and aqueous phases, an electron is not spontaneously transferred from methylamine to  $\text{Q}^{+\bullet}$ , implying that phenolic hydrogen is transferred as a proton, i.e., that  $\text{Q}^{+\bullet}$  conforms to the SET-PT mechanism.

**Table S7** Crucial bond distances in the product complex of the reaction in the 4' position of  $\text{Q}^{+\bullet}$  with methylamine in the gaseous and aqueous phases

| Product complex | Bond distances (pm)     |           |           |
|-----------------|-------------------------|-----------|-----------|
|                 | N11 – H4'               | H4' – O4' | O4' – C4' |
| PC4'            | <b>Gaseous phase</b>    |           |           |
|                 | 109.7                   | 147.1     | 126.9     |
| PC4'            | <b>Aqueous solution</b> |           |           |
|                 | 103.4                   | 184.2     | 125.2     |

### Spin density distribution in the hypothetical reactant complexes and product complexes (Figs S25, S26)

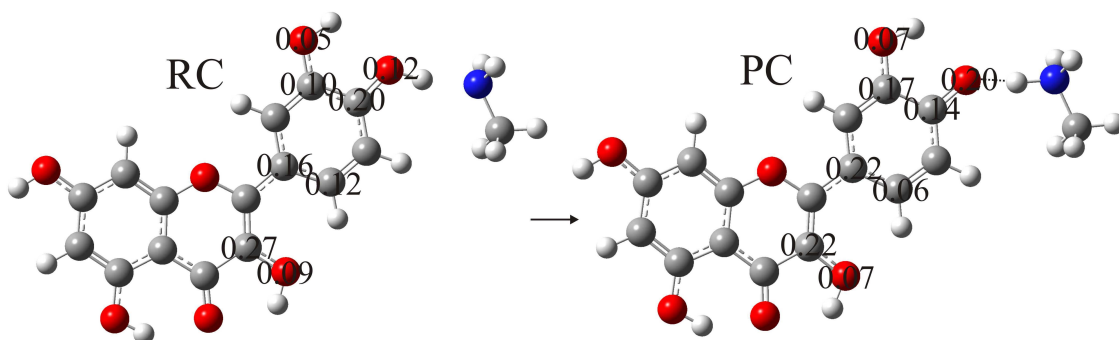

**Fig. S25** Reaction in the position 4' of  $Q^{+\bullet}$  in the gaseous phase.

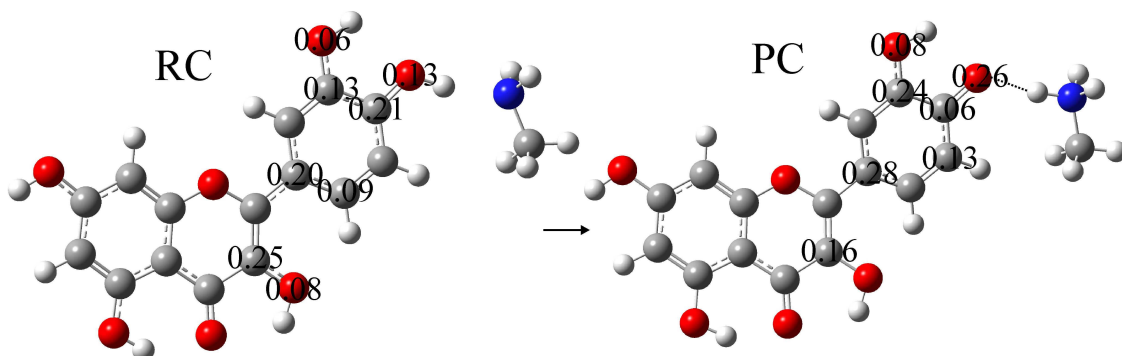

**Fig. S26** Reaction in the position 4' of  $Q^{+\bullet}$  in the aqueous solution.
